# Supplementary material for: Differences in monocyte subsets are associated with short‐term survival in patients with septic shock
Source: PubMed Central journal article supplement (PMC7686971; doi:10.1111/jcmm.15791), 2020-09-19
Supplement: JCMM-24-12504-s001.pdf [file JCMM-24-12504-s001.pdf]

## **Supplemental Information**

### **Differences in monocyte subsets are associated with short-term survival in patients with septic shock**

Marcela Hortová-Kohoutková<sup>1</sup>, Petra Lázníčková<sup>1,2</sup>, Kamila Bendíčková<sup>1</sup>, Marco De Zuani<sup>1</sup>, Ivana Andrejčinová<sup>1,2</sup>, Veronika Tomášková<sup>1,3</sup>, Pavel Suk<sup>1,3</sup>, Vladimír Šrámek<sup>3</sup>, Martin Helán<sup>1,3</sup>, and Jan Frič<sup>1,4\*</sup>

<sup>1</sup> International Clinical Research Center, St. Anne's University Hospital Brno, Brno.

<sup>2</sup> Department of Biology, Faculty of Medicine, Masaryk University, Brno, Czech Republic

<sup>3</sup> Department of Anesthesiology and Intensive Care, Faculty of Medicine, Masaryk University, Brno, Czech Republic.

<sup>4</sup> Institute of Hematology and Blood Transfusion, Prague, Czech Republic

\* Corresponding author: e-mail: [jan.fric@fnusa.cz](mailto:jan.fric@fnusa.cz)

Figure S1, related to Table 1

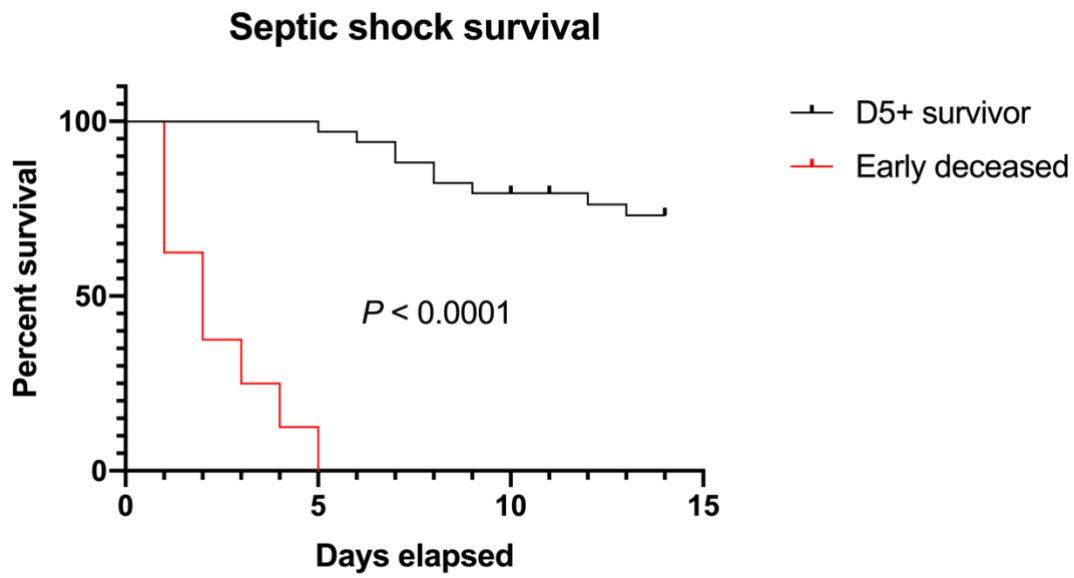

**Figure S1 | Comparison of survivor curves of D5+ survivors and Early deceased patients with septic shock.**

Figure S2, related to Figure 4

|                        |                          |        | Classical monocytes |               |               |             |                         | Intermediate monocytes |               |             |                     |               | Non-classical monocytes |             |                     |        | T cells |                 |        | Cytokines & chemokines |        |        |        |        |  |
|------------------------|--------------------------|--------|---------------------|---------------|---------------|-------------|-------------------------|------------------------|---------------|-------------|---------------------|---------------|-------------------------|-------------|---------------------|--------|---------|-----------------|--------|------------------------|--------|--------|--------|--------|--|
|                        |                          | SOFA   | Lactate             | frequency (%) | HLA-DR+ (GMF) | CD86+ (GMF) | HLA-DRlo/- CD86lo/- (%) | frequency (%)          | HLA-DR+ (GMF) | CD86+ (GMF) | HLA-DRlo/- CD86lo/- | frequency (%) | HLA-DR+ (GMF)           | CD86+ (GMF) | HLA-DRlo/- CD86lo/- | CD4+   | CD8+    | CD4+/CD8+ ratio | MCP-1  | IL-6                   | IL-8   | IL-10  | IL-18  | IL-33  |  |
|                        | SOFA                     |        | 0.234               | -0.205        | -0.281        | -0.211      | 0.348                   | 0.235                  | -0.207        | -0.297      | 0.256               | -0.082        | -0.165                  | -0.166      | 0.334               | 0.161  | -0.175  | 0.035           | 0.272  | 0.244                  | 0.255  | 0.189  | 0.225  | 0.163  |  |
|                        | Lactate                  | 0.234  |                     | -0.424        | -0.307        | -0.337      | 0.508                   | 0.507                  | -0.311        | -0.460      | 0.477               | -0.173        | -0.291                  | -0.384      | 0.371               | -0.135 | 0.052   | -0.106          | 0.697  | 0.662                  | 0.603  | 0.706  | 0.176  | 0.296  |  |
| Classical              | frequency (%)            | -0.205 | -0.424              |               | -0.074        | 0.048       | -0.309                  | -0.733                 | -0.184        | 0.074       | -0.295              | -0.590        | -0.148                  | 0.017       | -0.199              | 0.031  | -0.044  | 0.067           | -0.485 | -0.407                 | -0.384 | -0.310 | -0.276 | 0.009  |  |
|                        | HLA-DR+ (GMF)            | -0.281 | -0.307              | -0.074        |               | 0.715       | -0.478                  | -0.144                 | 0.791         | 0.730       | -0.270              | 0.167         | 0.688                   | 0.403       | -0.113              | -0.169 | 0.288   | -0.222          | -0.242 | -0.192                 | -0.160 | -0.247 | -0.281 | -0.278 |  |
|                        | CD86+ (GMF)              | -0.211 | -0.337              | 0.048         | 0.715         |             | -0.743                  | -0.326                 | 0.725         | 0.736       | -0.370              | 0.069         | 0.727                   | 0.675       | -0.374              | 0.021  | 0.101   | -0.099          | -0.379 | -0.334                 | -0.303 | -0.324 | -0.381 | -0.307 |  |
|                        | HLA-DR lo/- CD86lo/- (%) | 0.348  | 0.508               | -0.309        | -0.478        | -0.743      |                         | 0.487                  | -0.368        | -0.689      | 0.582               | -0.096        | -0.338                  | -0.572      | 0.549               | -0.130 | -0.044  | -0.037          | 0.554  | 0.549                  | 0.518  | 0.485  | 0.522  | 0.333  |  |
|                        | frequency (%)            | 0.235  | 0.507               | -0.733        | -0.144        | -0.326      | 0.487                   |                        | -0.159        | -0.241      | 0.254               | 0.229         | -0.158                  | -0.131      | 0.124               | -0.050 | 0.079   | -0.152          | 0.569  | 0.439                  | 0.377  | 0.467  | 0.471  | 0.073  |  |
| Intermediate           | HLA-DR+ (GMF)            | -0.207 | -0.311              | -0.184        | 0.791         | 0.725       | -0.368                  | -0.159                 |               | 0.546       | -0.242              | 0.310         | 0.964                   | 0.551       | -0.186              | -0.210 | 0.305   | -0.233          | -0.240 | -0.150                 | -0.121 | -0.211 | -0.247 | -0.202 |  |
|                        | CD86+ (GMF)              | -0.297 | -0.460              | 0.074         | 0.730         | 0.736       | -0.689                  | -0.241                 | 0.546         |             | -0.546              | 0.192         | 0.465                   | 0.630       | -0.358              | 0.044  | 0.128   | -0.119          | -0.413 | -0.416                 | -0.384 | -0.363 | -0.341 | -0.336 |  |
|                        | HLA-DR lo/- CD86lo/- (%) | 0.256  | 0.477               | -0.295        | -0.270        | -0.370      | 0.582                   | 0.254                  | -0.242        | -0.546      |                     | -0.114        | -0.207                  | -0.439      | 0.620               | 0.002  | -0.047  | -0.047          | 0.603  | 0.527                  | 0.511  | 0.230  | 0.355  | 0.139  |  |
| Non-classical          | frequency (%)            | -0.082 | -0.173              | -0.590        | 0.167         | 0.069       | -0.096                  | 0.229                  | 0.310         | 0.192       | -0.114              |               | 0.246                   | 0.228       | -0.105              | -0.029 | 0.059   | -0.012          | -0.076 | -0.062                 | -0.055 | -0.121 | -0.010 | -0.204 |  |
|                        | HLA-DR+ (GMF)            | -0.165 | -0.291              | -0.148        | 0.688         | 0.727       | -0.338                  | -0.158                 | 0.964         | 0.465       | -0.207              | 0.246         |                         | 0.631       | -0.259              | -0.161 | 0.247   | -0.196          | -0.208 | -0.145                 | -0.125 | -0.187 | -0.215 | -0.188 |  |
|                        | CD86+ (GMF)              | -0.166 | -0.384              | 0.017         | 0.403         | 0.675       | -0.572                  | -0.131                 | 0.551         | 0.630       | -0.439              | 0.228         |                         | 0.631       | -0.726              | 0.150  | 0.042   | 0.003           | -0.322 | -0.376                 | -0.393 | -0.252 | -0.062 | -0.348 |  |
|                        | HLA-DR lo/- CD86lo/- (%) | 0.334  | 0.371               | -0.199        | -0.113        | -0.374      | 0.549                   | 0.124                  | -0.186        | -0.358      | 0.620               | -0.105        | -0.259                  | -0.726      |                     | -0.103 | 0.000   | -0.104          | 0.351  | 0.460                  | 0.505  | 0.176  | 0.055  | 0.322  |  |
| T cells                | CD4+                     | 0.161  | -0.135              | 0.031         | -0.169        | 0.021       | -0.130                  | -0.050                 | -0.210        | 0.044       | 0.002               | -0.029        | -0.161                  | 0.150       | -0.103              |        | -0.882  | 0.806           | -0.060 | -0.257                 | -0.194 | -0.375 | 0.157  | -0.187 |  |
|                        | CD8+                     | -0.175 | 0.052               | -0.044        | 0.288         | 0.101       | -0.044                  | 0.079                  | 0.305         | 0.128       | -0.047              | 0.059         | 0.247                   | 0.042       | 0.000               | -0.882 |         | -0.873          | -0.008 | 0.173                  | 0.116  | 0.302  | -0.136 | 0.147  |  |
|                        | CD4+/CD8+ ratio          | 0.035  | -0.106              | 0.067         | -0.222        | -0.099      | -0.037                  | -0.152                 | -0.233        | -0.119      | -0.047              | -0.012        | -0.196                  | 0.003       | -0.104              | 0.806  | -0.873  |                 | -0.054 | -0.223                 | -0.176 | -0.259 | 0.179  | -0.119 |  |
| Cytokines & chemokines | MCP-1                    | 0.272  | 0.697               | -0.485        | -0.242        | -0.379      | 0.554                   | 0.569                  | -0.240        | -0.413      | 0.603               | -0.076        | -0.208                  | -0.322      | 0.351               | -0.060 | -0.008  | -0.054          |        | 0.819                  | 0.767  | 0.687  | 0.304  | 0.114  |  |
|                        | IL-6                     | 0.244  | 0.662               | -0.407        | -0.192        | -0.334      | 0.549                   | 0.439                  | -0.150        | -0.416      | 0.527               | -0.062        | -0.145                  | -0.376      | 0.460               | -0.257 | 0.173   | -0.223          | 0.819  |                        | 0.969  | 0.753  | 0.113  | 0.239  |  |
|                        | IL-8                     | 0.255  | 0.603               | -0.384        | -0.160        | -0.303      | 0.518                   | 0.377                  | -0.121        | -0.384      | 0.511               | -0.055        | -0.125                  | -0.393      | 0.505               | -0.194 | 0.116   | -0.176          | 0.767  | 0.969                  |        | 0.622  | 0.049  | 0.171  |  |
|                        | IL-10                    | 0.189  | 0.706               | -0.310        | -0.247        | -0.324      | 0.485                   | 0.467                  | -0.211        | -0.363      | 0.230               | -0.121        | -0.187                  | -0.252      | 0.176               | -0.375 | 0.302   | -0.259          | 0.687  | 0.753                  | 0.622  |        | 0.221  | 0.340  |  |
|                        | IL-18                    | 0.225  | 0.176               | -0.276        | -0.281        | -0.381      | 0.522                   | 0.471                  | -0.247        | -0.341      | 0.355               | -0.010        | -0.215                  | -0.062      | 0.055               | 0.157  | -0.136  | 0.179           | 0.304  | 0.113                  | 0.049  | 0.221  |        | 0.011  |  |
|                        | IL-33                    | 0.163  | 0.296               | 0.009         | -0.278        | -0.307      | 0.333                   | 0.073                  | -0.202        | -0.336      | 0.139               | -0.204        | -0.188                  | -0.348      | 0.322               | -0.187 | 0.147   | -0.119          | 0.114  | 0.239                  | 0.171  | 0.340  | 0.011  |        |  |

**Figure S2 | Analysis of correlations between monocyte, T cell parameters with produced cytokines.**

Measured parameters of monocyte and T cells, together with secreted cytokines were analyzed and correlation analysis was performed using Spearman's rank correlation coefficient.
